# Supplementary material
Source: ML conference proceedings conference paper supplement (https://aclanthology.org/2021.naacl-main.122)
Supplement: OptionalSupplementaryCode [file 2021.naacl-main.122.OptionalSupplementaryCode.zip]

Code and data are available on GitHub.  
[https://github.com/hanjanghoon/BERT\\_FP](https://github.com/hanjanghoon/BERT_FP)
